# Supplementary material
Source: PubMed Central journal article supplement (PMC4457321)

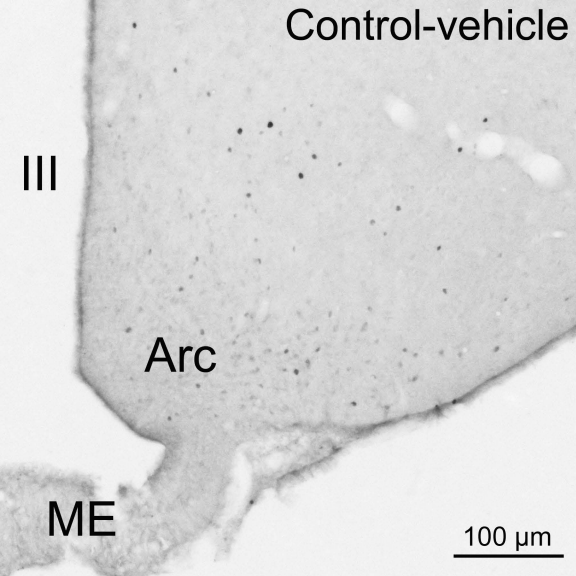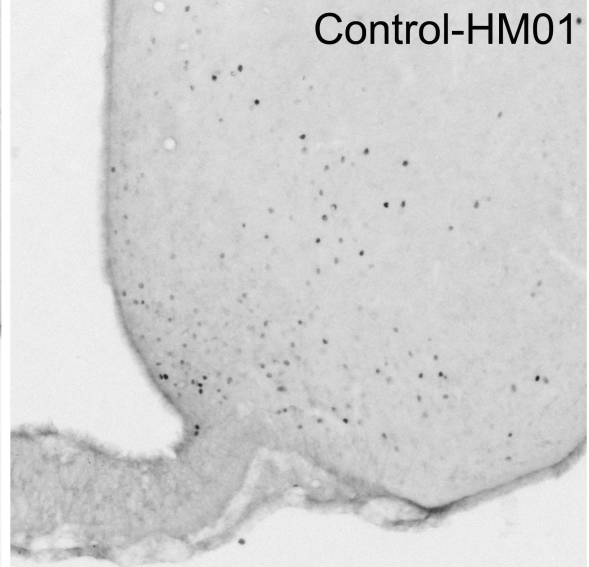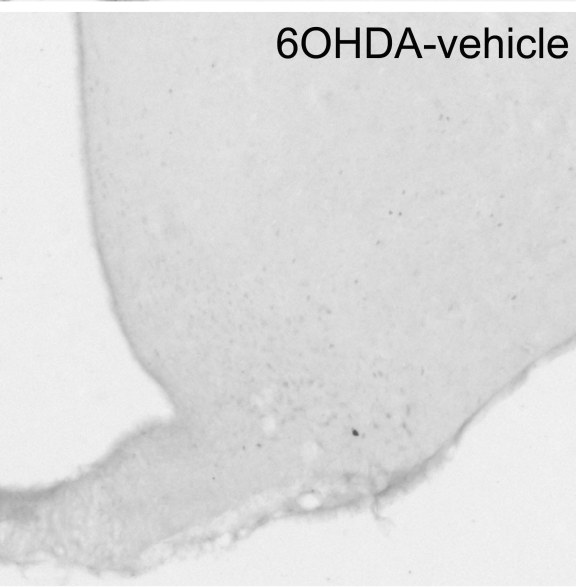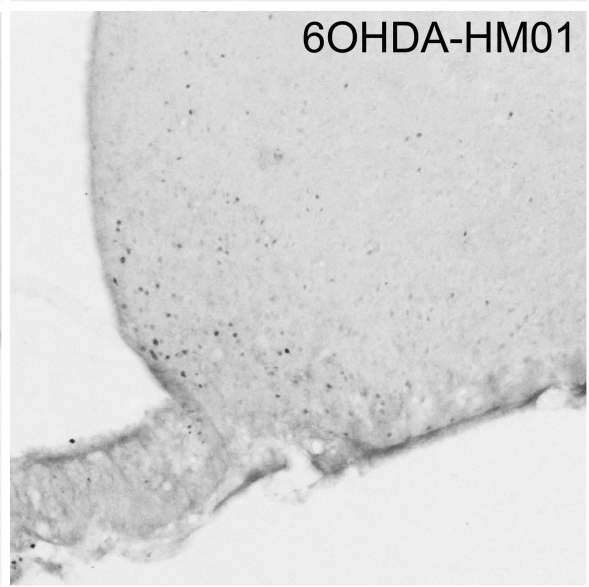

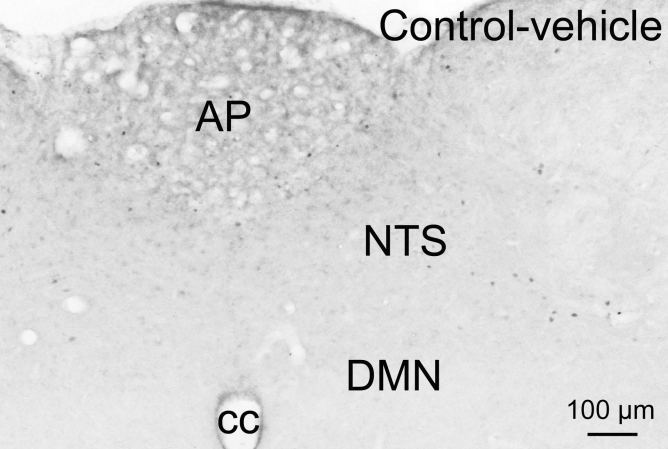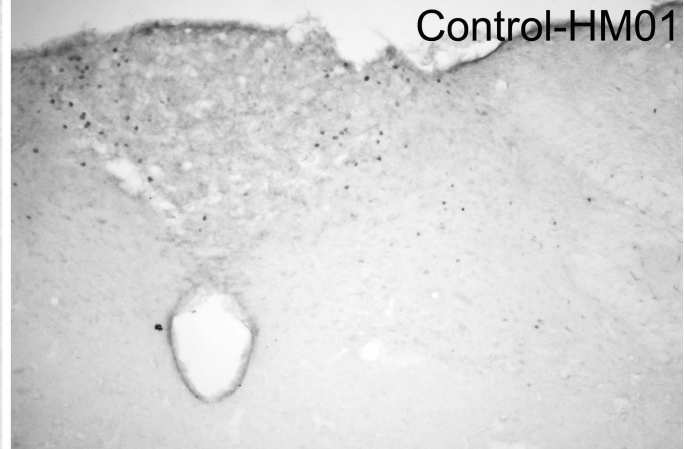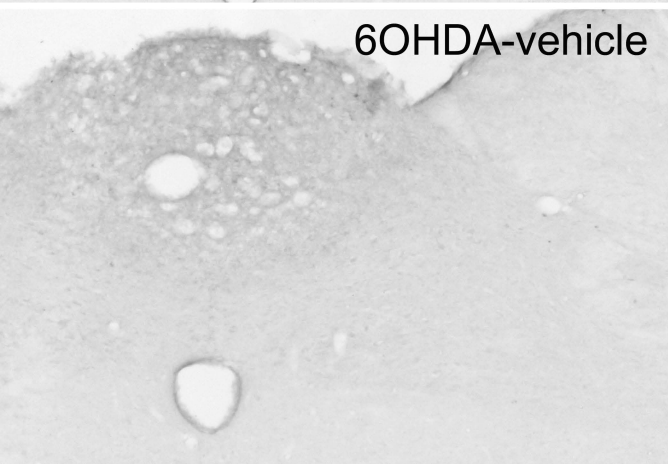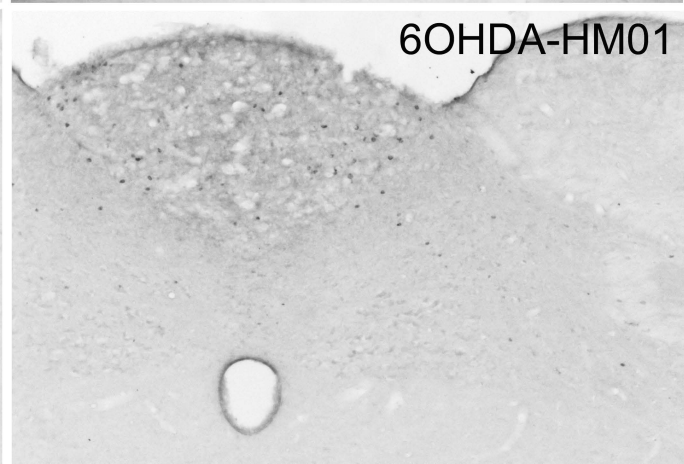

Control-vehicle

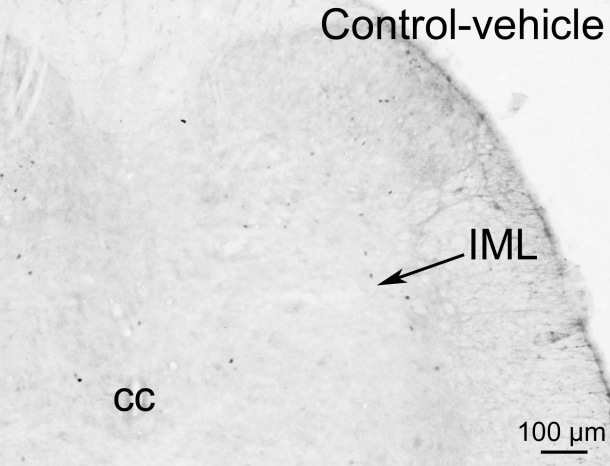

Control-HM01

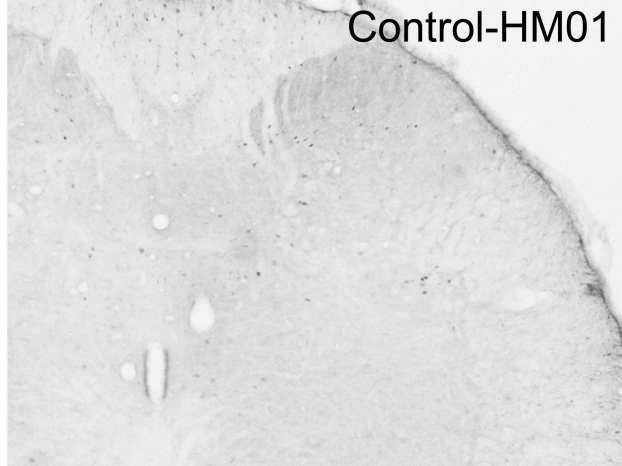

6OHDA-vehicle

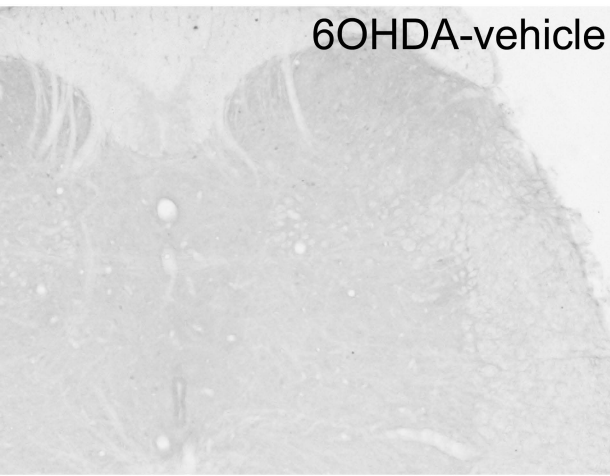

6OHDA-HM01

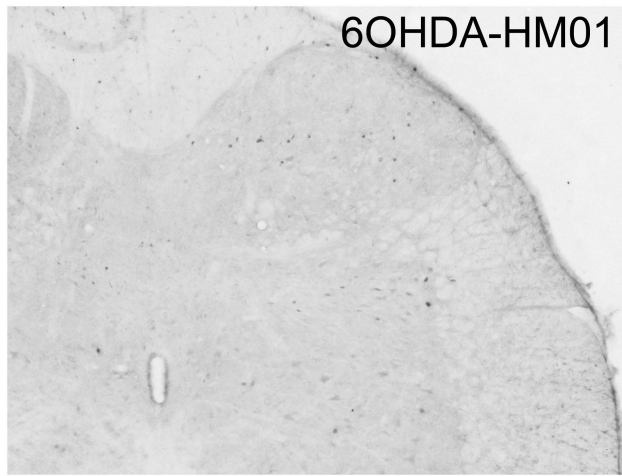

Control-vehicle

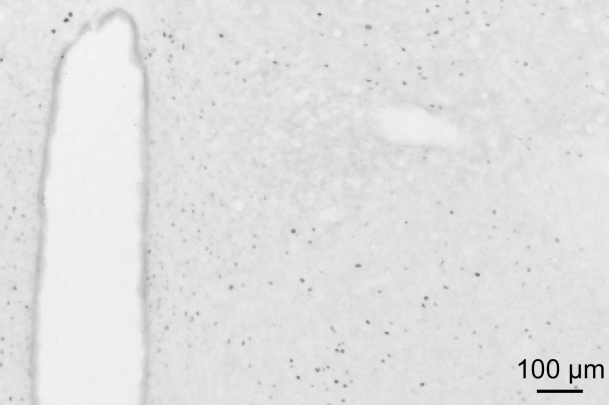

Control-HM01

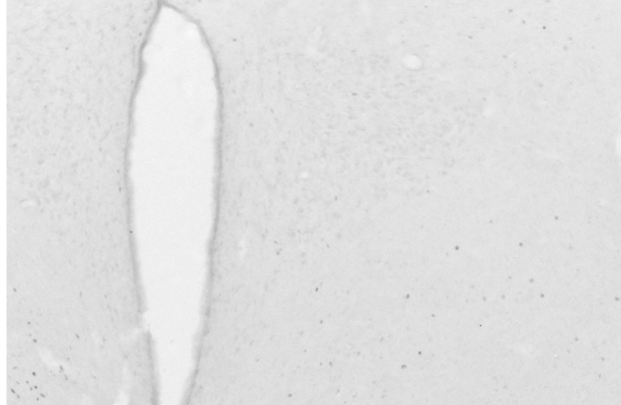

6OHDA-vehicle

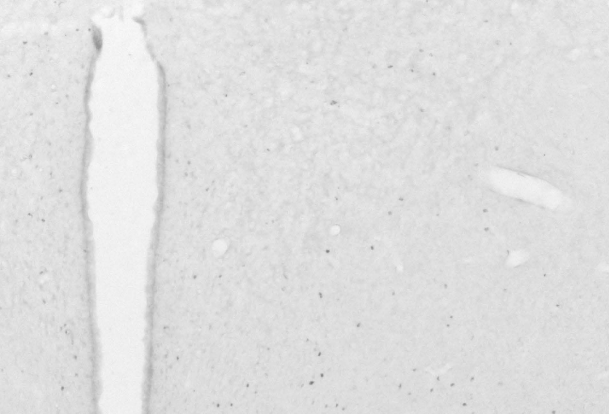

6OHDA-HM01

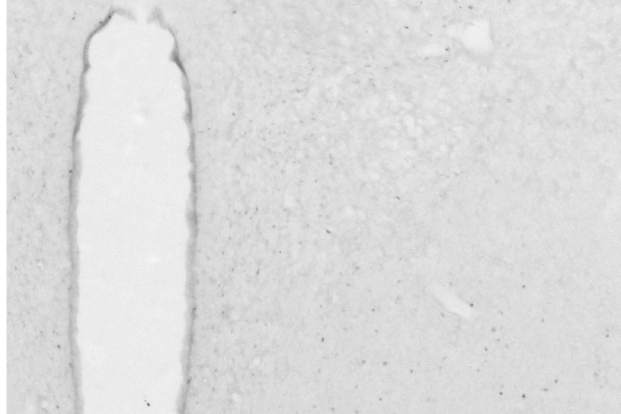

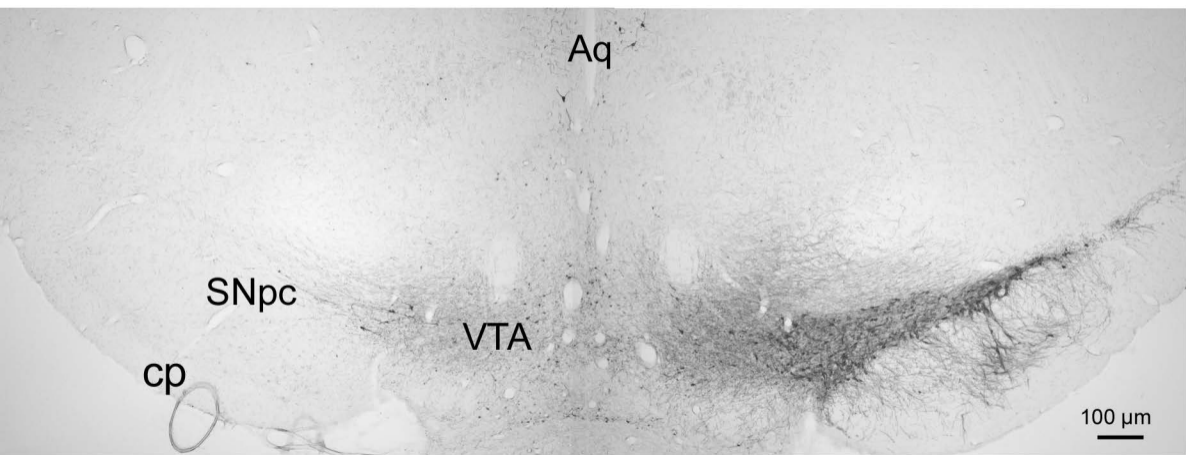

Supplement: NIHMS687630-supplement-Supp_FigureS1-S5.pdf [file NIHMS687630-supplement-Supp_FigureS1-S5.pdf]
